# Supplementary material
Source: HighWire-hosted journal article supplement (http://dmd.aspetjournals.org/highwire/filestream/66295/field_highwire_adjunct_files/0/053595_Suppl_Fig_S1.pdf)
Supplement: 053595_Suppl_Fig_S1.pdf [file 053595_Suppl_Fig_S1.pdf]

## Different hydrolases involved in bioactivation of prodrug-type angiotensin receptor blockers: carboxymethylenebutenolidase and carboxylesterase 1

Tomoko Ishizuka, Yasushi Yoshigae, Nobuyuki Murayama, and Takashi Izumi.

Drug Metabolism and Disposition

Supplemental Figure S1

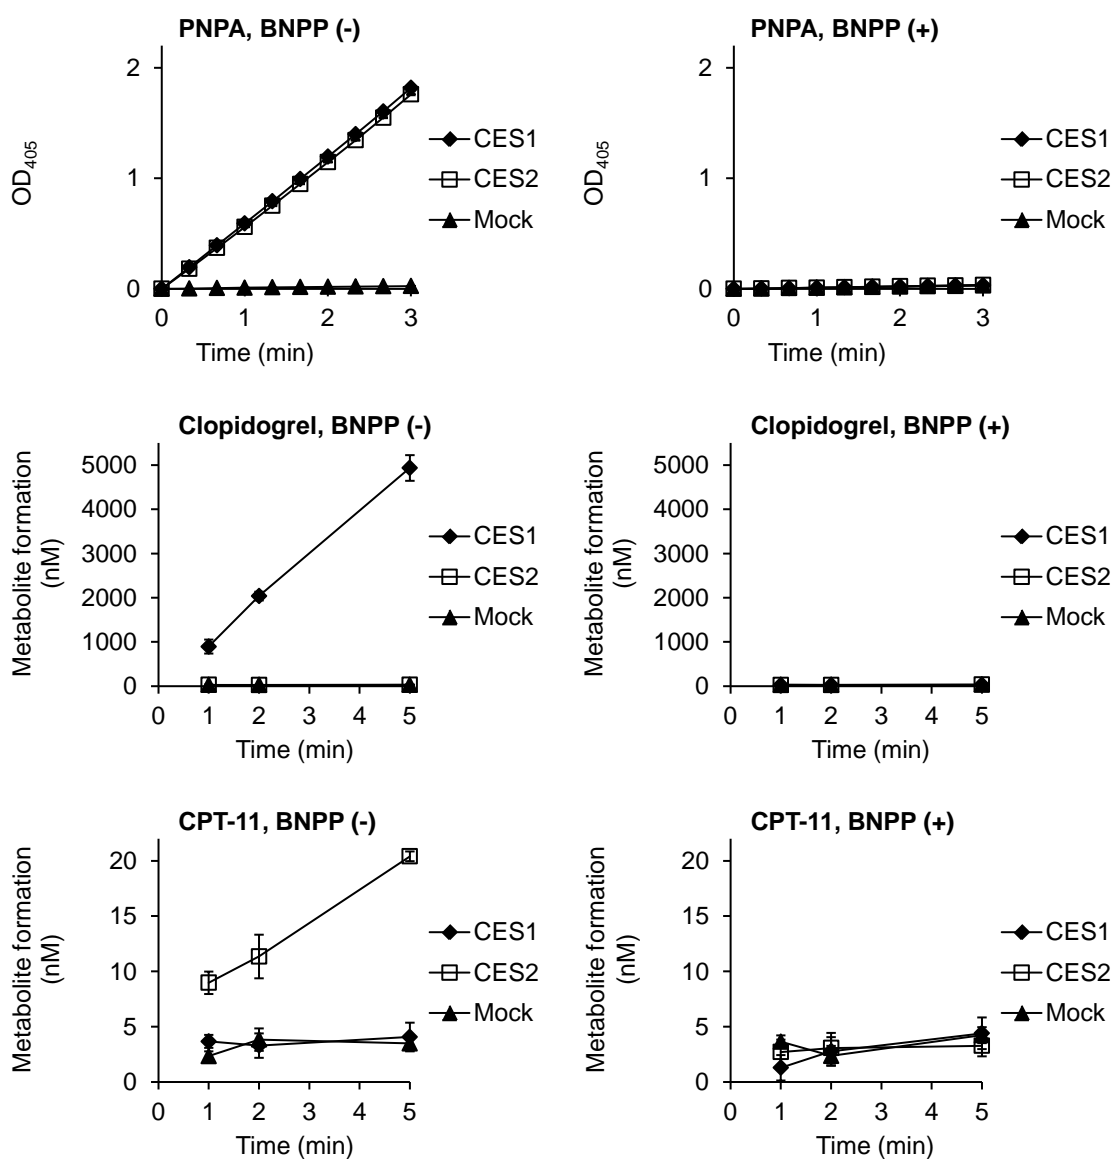

Supplemental Figure S1 Hydrolysis of *p*-nitrophenyl acetate (PNPA), clopidogrel, and CPT-11 by recombinant human CES1 and CES2.

PNPA (1 mM), clopidogrel, and CPT-11 (10  $\mu$ M each) were incubated in 50 mM Tris-HCl buffer (pH 7.5) with 5% (v/v) conditioned media from human CES1- or CES2-overexpressed cell culture as an enzyme source under the conditions with or without 1 mM bis-*p*-nitrophenylphosphate (BNPP). PNPA-hydrolase activity at 30 °C was determined by monitoring the absorbance at 405 nm. Clopidogrel- and CPT-11-hydrolase activities at 37 °C were determined by measuring formed metabolites, clopidogrel carboxylic acid and SN-38, respectively, by LC-MS/MS. Data represent the means  $\pm$  SD of triplicate determinations.
